# Supplementary material for: Effects of mulberry twig alkaloids and canagliflozin in inadequately controlled type 2 diabetes: a randomized controlled study based on flash glucose monitoring
Source: Research Square preprint supplement (doi:10.21203/rs.3.rs-8391022/v1), 2026-01-22
Supplement: Supplementary file 1 [file 2e77082f78a81d869b2fbf4c.docx]

**Table 1 Characteristics of general parameters of study populations**

| **Characteristics** | **Mulberry Twig Alkaloids (n=27)** | **Canagliflozin (n=28)** |
| --- | --- | --- |
| Sex (male/female) | 14/13 | 16/12 |
| Age (years) | 61.52±7.11 | 59.11±9.46 |
| Diabetic duration (years) | 7 (4, 10) | 8 (5, 10) |
| Use of metformin (n (%)) | 22 (81.48%) | 21 (75%) |
| Use of sulphonylurea (n (%)) | 15 (55.56%) | 16 (57.14%) |
| Use of DPP-IV inhibitors (n (%)) | 7 (25.93%) | 8 (28.57%) |
| SCr (mol/L) | 63.91±13.91 | 62.36±14.74 |
| Hemoglobin (g/L) | 144.74±11.40 | 143.93±12.61 |

Values are presented as means ± SD, or median (25th – 75th range), or numbers (%).

Abbreviations: DPP-VI, dipeptidyl peptidase-IV; SCr, serum creatinine.

**Table 2 Changes of metabolic parameters before and after Mulberry Twig Alkaloids and Canagliflozin treatment**

|  | **Mulberry Twig Alkaloids (n=27)** | | **Canagliflozin (n=28)** | |  |
| --- | --- | --- | --- | --- | --- |
|  | **Baseline** | **At 12 weeks** | **Baseline** | **At 12 weeks** | ***P*** |
| Weight (kg) | 66.24±10.14 | 64.61±10.23*** | 66.78±10.95 | 65.11±10.74*** | 0.960 |
| BMI (kg/m2) | 24.78±2.93 | 24.17±3.01*** | 24.75±3.12 | 24.14±3.25*** | 0.986 |
| WC (cm) | 89.96±8.89 | 88.11±8.54** | 88.16±7.51 | 86.25±7.62** | 0.798 |
| Waist-hip ratio (cm/cm) | 0.94±0.08 | 0.93±0.08 | 0.92±0.06 | 0.91±0.05 | 0.870 |
| SBP (mmHg) | 131.26±14.15 | 126.96±14.07 | 123.71±11.00 | 123.64±11.29 | 0.643 |
| DBP (mmHg) | 81.41±9.74 | 77.74±10.63 | 80.86±10.71 | 79.14±8.04 | 0.447 |
| Heart rate (bmp) | 74.37±8.19 | 73.63±7.95 | 79.68±10.74 | 77.04±8.72 | 0.801 |
| Uric acid (mol/L) | 290.33±101.43 | 293.62±99.29 | 287.02±75.28 | 279.86±85.93 | 0.566 |
| TC (mmol/L) | 4.85±0.73 | 4.51±0.86** | 5.20±1.63 | 5.09±1.26 | 0.054 |
| TG (mmol/L) | 1.48 (1.10, 3.09) | 1.34 (1.34, 1.96)* | 1.73 (1.17, 3.16) | 1.35 (0.94, 1.62)** | 0.308 |
| HDL (mmol/L) | 1.32±0.33 | 1.25±0.28** | 1.25±0.30 | 1.31±0.26* | <0.001 |
| LDL (mmol/L) | 2.67 (2.28, 3.26) | 2.80 (2.17, 3.22) | 3.15 (1.95, 3.87) | 3.17(2.31, 3.80) | 0.580 |

Values are presented as means ± SD, or median (25th – 75th range), or numbers (%).

Abbreviations: BMI, body mass index; WC, waist circumference; HC, hip circumference; SBP, systolic blood pressure; DBP, diastolic blood pressure; TC, total cholesterol; TG, triglyceride; HDL, high density lipoprotein; LDL, low density lipoprotein. **P*<0.05, ***P*<0.01, ****P*<0.001 vs. Baseline.

**Table 3 Characteristics of daily glycemic control before and after Mulberry Twig Alkaloids and Canagliflozin treatment**

|  | **Mulberry Twig Alkaloids (n=27)** | | **Canagliflozin (n=28)** | | ***P*** |
| --- | --- | --- | --- | --- | --- |
|  | **Baseline** | **At 12 weeks** | **Baseline** | **At 12 weeks** |
| MAGE (mmol/L) | 5.59±1.98 | 5.43±1.75 | 6.41±2.13 | 6.42±2.02 | 0.618 |
| SDBG (mmol/L) | 2.63±0.56 | 2.25±0.64** | 2.76±0.73 | 2.571±0.68 | 0.599 |
| CV% | 28.78±6.43 | 26.95±6.96 | 29.49±6.27 | 30.72±6.30 | 0.242 |
| TAR >10.0mmol/L | 34.93±19.64 | 23.85±20.69* | 39.91±25.69 | 26.23±17.45** | 0.886 |
| TBR <3.9mmol/L | 0 (0.00-0.52) | 0.04 (0.04-0.58) | 0 (0.00-1.175) | 0.16 (0.16-0.92) | 0.871 |
| AUC > 10.0mmol/L | 1119.0 (593.5,1891.5) | 483.8 (228.3,832.2) ** | 1428.0 (500.1, 2711.2) | 449.4 (297.1, 1445.1) * | 0.608 |
| AUC 3.9-10.0mmol/L | 3267.17±862.94 | 4940.67±1379.00*** | 2773.83±1013.06 | 4579.16±908.09*** | 0.704 |
| AOC < 3.9 mmol/L | 0 (0.00, 2.94) | 0.06 (0.00, 3.27) | 0 (0.00, 9.44) | 0.35 (0.00, 4.07) | 0.946 |
| Pre-breakfast BG (mmol/l) | 7.31±1.60 | 6.85±1.43 | 7.46±2.04 | 6.73±1.27 | 0.562 |
| PPBG peak-breakfast (mmol/l) | 12.89±2.04 | 11.29±2.00*** | 13.41±3.08 | 12.12±2.44* | 0.280 |
| PPGE of breakfast (mmol/l) | 5.54±1.63 | 4.44±1.45*** | 5.92±1.88 | 5.38±1.69 | **0.032** |
| Pre-lunch BG (mmol/l) | 8.26±2.59 | 7.22±2.21* | 8.44±3.43 | 6.99±1.85* | 0.427 |
| PPBG peak-lunch (mmol/l) | 12.74±2.61 | 11.21±2.56** | 12.63±3.30 | 11.27±2.36* | 0.863 |
| PPGE of lunch (mmol/l) | 4.46±1.75 | 3.97±1.52 | 4.16±1.81 | 4.28±1.88 | 0.220 |
| Pre-dinner BG (mmol/l) | 8.17±2.06 | 7.41±1.78* | 8.47±2.78 | 7.08±1.84** | 0.312 |
| PPBG peak-dinner (mmol/l) | 12.49±2.69 | 11.2±2.31* | 12.5±2.99 | 11.84±2.32 | 0.240 |
| PPGE of dinner (mmol/l) | 4.30±1.60 | 3.78±1.38 | 4.02±1.83 | 4.76±1.67* | **0.007** |

Values are presented as means ± SD, or median (25th – 75th range).

Abbreviations: MAGE: mean amplitude of glycemic excursions (mmol/L); SDMG: standard deviation (mmol/L); CV%: the coefficient of variation; MinBG: minimum blood glucose (mmol/L); MaxBG: maximum blood glucose (mmol/L) ; TAR : time above range (%); TBR : time below range (%); AUC > 10.0 mmol/L: the incremental area under the curve (AUC) of glucose >10.0 mmol/L (mmol/L∗hour); AOC < 3.9 mmol/L: the incremental area over the curve (AOC) of plasma glucose < 3.9 mmol/L (mmol/L∗hour); AUC 3.9-10.0 mmol/L: the incremental AUC of glucose levels between 3.9 and 10 mmol/L (mmol/L∗hour); PPBG, postprandial blood glucose; PPGE, postprandial glucose excursion. **P*<0.05, ***P*<0.01, ****P*<0.001 vs. Baseline.
