# Supplementary figures and images for: Effects of mulberry twig alkaloids and canagliflozin in inadequately controlled type 2 diabetes: a randomized controlled study based on flash glucose monitoring
Source: Research Square preprint supplement (doi:10.21203/rs.3.rs-8391022/v1), 2026-01-22

**Supplementary Figure 1 Study design and the flowchart of patients in the study.**


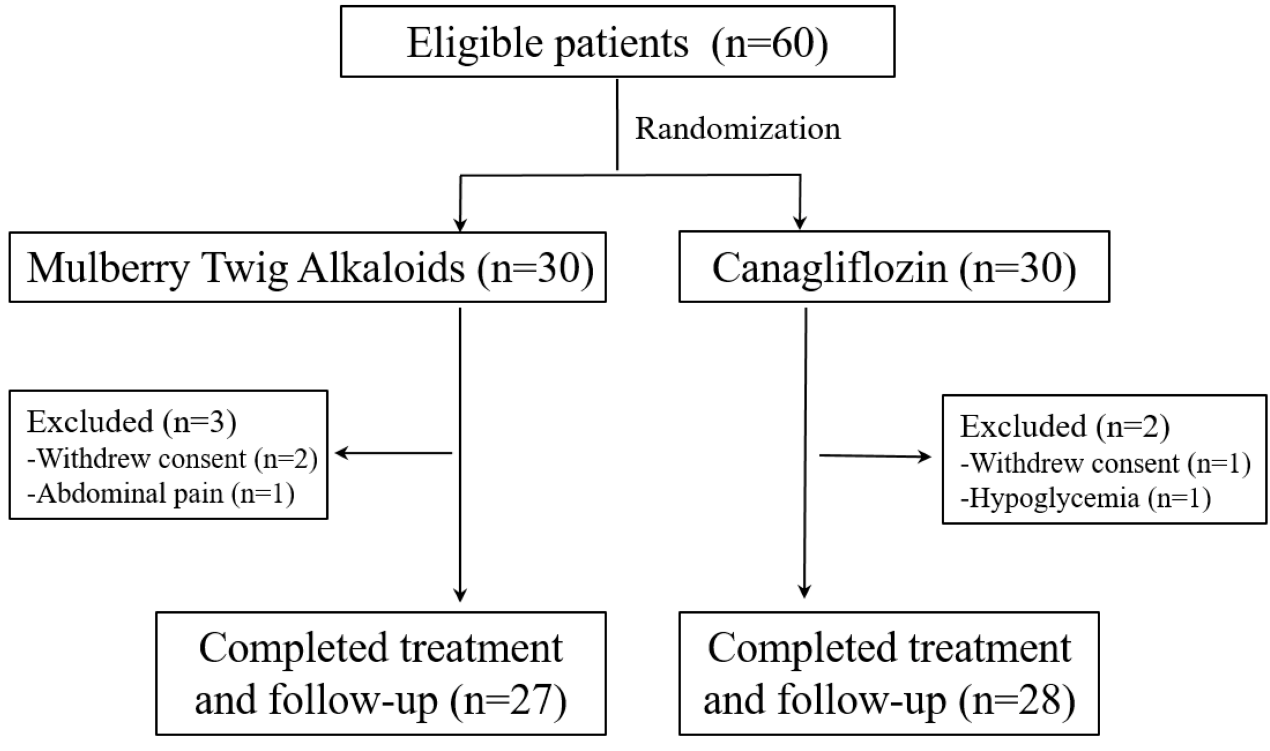

Supplement: Supplementary file 2 [file f090436d305a705eafccfdcd.docx]
